# Supplementary material for: Metabolic Pathway Genes Associated with Susceptibility Genes to Coronary Artery Disease
Source: Int J Genomics. 2018 Feb 11;2018:9025841. doi: 10.1155/2018/9025841 (PMC5828413; doi:10.1155/2018/9025841)
Supplement: Supplementary 2 — Table S1: list of CAD genes in this study. Table S2: list of metabolic pathways used in this study. Gene number indicated totally predicted genes in the pathways. Table S3: CAD gene ID identified in the coexpression network. Table S4: metabolic gene ID identified in the coexpression network. [file 9025841.f2.xlsx]

## Sheet: Table S1
TABLE S1: List of CAD genes in this study.
Entrez Gene ID	Gene Symbol	GO Annotation
105	ADARB2	adenosine deaminase, RNA-specific, B2 (non-functional)
183	AGT	angiotensinogen (serpin peptidase inhibitor, clade A, member 8)
238	ALK	anaplastic lymphoma receptor tyrosine kinase
490	ATP2B1	ATPase, Ca++ transporting, plasma membrane 1
775	CACNA1C	calcium channel, voltage-dependent, L type, alpha 1C subunit
783	CACNB2	calcium channel, voltage-dependent, beta 2 subunit
1012	CDH13	cadherin 13
1021	CDK6	cyclin-dependent kinase 6
1072	CFL1	cofilin 1 (non-muscle)
1310	COL19A1	collagen, type XIX, alpha 1
1445	CSK	c-src tyrosine kinase
1586	CYP17A1	cytochrome P450, family 17, subfamily A, polypeptide 1
1591	CYP24A1	cytochrome P450, family 24, subfamily A, polypeptide 1
1611	DAP	death-associated protein
2122	MECOM	MDS1 and EVI1 complex locus
2242	FES	feline sarcoma oncogene
2321	FLT1	fms-related tyrosine kinase 1
2917	GRM7	glutamate receptor, metabotropic 7
2982	GUCY1A3	guanylate cyclase 1, soluble, alpha 3
3077	HFE	hemochromatosis
3091	HIF1A	hypoxia inducible factor 1, alpha subunit (basic helix-loop-helix transcription factor)
3570	IL6R	interleukin 6 receptor
3784	KCNQ1	potassium voltage-gated channel, KQT-like subfamily, member 1
3839	KPNA3	karyopherin alpha 3 (importin alpha 4)
4046	LSP1	lymphocyte-specific protein 1
4088	SMAD3	SMAD family member 3
4134	MAP4	microtubule-associated protein 4
4482	MSRA	methionine sulfoxide reductase A
4524	MTHFR	methylenetetrahydrofolate reductase (NAD(P)H)
4625	MYH7	myosin, heavy chain 7, cardiac muscle, beta
4629	MYH11	myosin, heavy chain 11, smooth muscle
4642	MYO1D	myosin ID
4650	MYO9B	myosin IXB
4774	NFIA	nuclear factor I/A
4836	NMT1	N-myristoyltransferase 1
4846	NOS3	nitric oxide synthase 3 (endothelial cell)
4883	NPR3	natriuretic peptide receptor C/guanylate cyclase C (atrionatriuretic peptide receptor C)
5126	PCSK2	proprotein convertase subtilisin/kexin type 2
5522	PPP2R2C	protein phosphatase 2, regulatory subunit B, gamma
5793	PTPRG	protein tyrosine phosphatase, receptor type, G
6311	ATXN2	ataxin 2
6597	SMARCA4	SWI/SNF related, matrix associated, actin dependent regulator of chromatin, subfamily a, member 4
6927	HNF1A	HNF1 homeobox A
7048	TGFBR2	transforming growth factor, beta receptor II (70/80kDa)
7092	TLL1	tolloid-like 1
7844	RNF103	ring finger protein 103
8672	EIF4G3	eukaryotic translation initiation factor 4 gamma, 3
9223	MAGI1	membrane associated guanylate kinase, WW and PDZ domain containing 1
9229	DLGAP1	discs, large (Drosophila) homolog-associated protein 1
9372	ZFYVE9	zinc finger, FYVE domain containing 9
9444	QKI	QKI, KH domain containing, RNA binding
9465	AKAP7	A kinase (PRKA) anchor protein 7
9570	GOSR2	Golgi SNAP receptor complex member 2
9734	HDAC9	histone deacetylase 9
9811	CTIF	CBP80/20-dependent translation initiation factor
9833	MELK	maternal embryonic leucine zipper kinase
9904	RBM19	RNA binding motif protein 19
9956	HS3ST2	heparan sulfate (glucosamine) 3-O-sulfotransferase 2
10019	SH2B3	SH2B adaptor protein 3
10318	TNIP1	TNFAIP3 interacting protein 1
22808	MRAS	muscle RAS oncogene homolog
22834	ZNF652	zinc finger protein 652
22978	NT5C2	5'-nucleotidase, cytosolic II
23076	RRP1B	ribosomal RNA processing 1B
23172	FAM175B	family with sequence similarity 175, member B
23233	EXOC6B	exocyst complex component 6B
23345	SYNE1	spectrin repeat containing, nuclear envelope 1
23544	SEZ6L	seizure related 6 homolog (mouse)-like
23551	RASD2	RASD family, member 2
25902	MTHFD1L	methylenetetrahydrofolate dehydrogenase (NADP+ dependent) 1-like
27185	DISC1	disrupted in schizophrenia 1
51061	TXNDC11	thioredoxin domain containing 11
51196	PLCE1	phospholipase C, epsilon 1
51208	CLDN18	claudin 18
54331	GNG2	guanine nucleotide binding protein (G protein), gamma 2
54622	ARL15	ADP-ribosylation factor-like 15
54953	C1orf27	chromosome 1 open reading frame 27
55017	C14orf119	chromosome 14 open reading frame 119
55137	FIGN	fidgetin
55553	SOX6	SRY (sex determining region Y)-box 6
55614	KIF16B	kinesin family member 16B
55622	TTC27	tetratricopeptide repeat domain 27
55691	FRMD4A	FERM domain containing 4A
55759	WDR12	WD repeat domain 12
56776	FMN2	formin 2
57134	MAN1C1	mannosidase, alpha, class 1C, member 1
57521	RPTOR	regulatory associated protein of MTOR, complex 1
57577	KIAA1407	KIAA1407
58483	LINC00474	long intergenic non-protein coding RNA 474
60676	PAPPA2	pappalysin 2
60680	CELF5	CUGBP, Elav-like family member 5
64116	SLC39A8	solute carrier family 39 (zinc transporter), member 8
64759	TNS3	tensin 3
79691	QTRTD1	queuine tRNA-ribosyltransferase domain containing 1
80312	TET1	tet methylcytosine dioxygenase 1
83938	C10orf11	chromosome 10 open reading frame 11
83943	IMMP2L	IMP2 inner mitochondrial membrane peptidase-like (S. cerevisiae)
84790	TUBA1C	tubulin, alpha 1c
85479	DNAJC5B	DnaJ (Hsp40) homolog, subfamily C, member 5 beta
89797	NAV2	neuron navigator 2
114876	OSBPL1A	oxysterol binding protein-like 1A
119391	GSTO2	glutathione S-transferase omega 2
119548	PNLIPRP3	pancreatic lipase-related protein 3
127833	SYT2	synaptotagmin II
133491	C5orf47	chromosome 5 open reading frame 47
140733	MACROD2	MACRO domain containing 2
143872	ARHGAP42	Rho GTPase activating protein 42
144100	PLEKHA7	pleckstrin homology domain containing, family A member 7
152273	FGD5	FYVE, RhoGEF and PH domain containing 5
162963	ZNF610	zinc finger protein 610
201266	SLC39A11	solute carrier family 39, member 11
204801	NLRP11	NLR family, pyrin domain containing 11
219621	C10orf107	chromosome 10 open reading frame 107
221692	PHACTR1	phosphatase and actin regulator 1
222255	ATXN7L1	ataxin 7-like 1
246213	SLC17A8	solute carrier family 17 (vesicular glutamate transporter), member 8
259232	NALCN	sodium leak channel, non-selective
375056	MIA3	melanoma inhibitory activity family, member 3
442117	GALNTL6	UDP-N-acetyl-alpha-D-galactosamine:polypeptide N-acetylgalactosaminyltransferase-like 6

## Sheet: Table S2
TABLE S2: List of metabolic pathways used in this study. Gene number indicated totally predicted genes in the pathways.
Pathway name	Pathway KEGG ID	Class of metabolism pathway	Gene Number
Glycolysis / Gluconeogenesis	10	Carbohydrate metabolism	67
Citrate cycle (TCA cycle)	20	Carbohydrate metabolism	31
Pentose phosphate pathway	30	Carbohydrate metabolism	29
Pentose and glucuronate interconversions	40	Carbohydrate metabolism	34
Fructose and mannose metabolism	51	Carbohydrate metabolism	36
Galactose metabolism	52	Carbohydrate metabolism	30
Ascorbate and aldarate metabolism	53	Carbohydrate metabolism	27
Starch and sucrose metabolism	500	Carbohydrate metabolism	56
Amino sugar and nucleotide sugar metabolism	520	Carbohydrate metabolism	49
Pyruvate metabolism	620	Carbohydrate metabolism	42
Glyoxylate and dicarboxylate metabolism	630	Carbohydrate metabolism	24
Propanoate metabolism	640	Carbohydrate metabolism	32
Butanoate metabolism	650	Carbohydrate metabolism	29
Inositol phosphate metabolism	562	Carbohydrate metabolism	61
Oxidative phosphorylation	190	Energy metabolism	133
Nitrogen metabolism	910	Energy metabolism	27
Sulfur metabolism	920	Energy metabolism	18
Fatty acid biosynthesis	61	Lipid metabolism	6
Fatty acid elongation	62	Lipid metabolism	23
Fatty acid metabolism	71	Lipid metabolism	44
Synthesis and degradation of ketone bodies	72	Lipid metabolism	9
Steroid biosynthesis	100	Lipid metabolism	18
Primary bile acid biosynthesis	120	Lipid metabolism	17
Steroid hormone biosynthesis	140	Lipid metabolism	56
Glycerolipid metabolism	561	Lipid metabolism	55
Glycerophospholipid metabolism	564	Lipid metabolism	91
Ether lipid metabolism	565	Lipid metabolism	42
Sphingolipid metabolism	600	Lipid metabolism	47
Arachidonic acid metabolism	590	Lipid metabolism	68
Linoleic acid metabolism	591	Lipid metabolism	33
alpha-Linolenic acid metabolism	592	Lipid metabolism	25
Biosynthesis of unsaturated fatty acids	1040	Lipid metabolism	21
Purine metabolism	230	Nucleotide metabolism	173
Pyrimidine metabolism	240	Nucleotide metabolism	107
Alanine, aspartate and glutamate metabolism	250	Amino acid metabolism	32
Glycine, serine and threonine metabolism	260	Amino acid metabolism	37
Cysteine and methionine metabolism	270	Amino acid metabolism	34
Valine, leucine and isoleucine degradation	280	Amino acid metabolism	44
Valine, leucine and isoleucine biosynthesis	290	Amino acid metabolism	2
Lysine biosynthesis	300	Amino acid metabolism	2
Lysine degradation	310	Amino acid metabolism	49
Arginine and proline metabolism	330	Amino acid metabolism	57
Histidine metabolism	340	Amino acid metabolism	28
Tyrosine metabolism	350	Amino acid metabolism	39
Phenylalanine metabolism	360	Amino acid metabolism	18
Tryptophan metabolism	380	Amino acid metabolism	40
Phenylalanine, tyrosine and tryptophan biosynthesis	400	Amino acid metabolism	5
beta-Alanine metabolism	410	Metabolism of other amino acids	29
Taurine and hypotaurine metabolism	430	Metabolism of other amino acids	10
Selenocompound metabolism	450	Metabolism of other amino acids	17
Cyanoamino acid metabolism	460	Metabolism of other amino acids	7
D-Glutamine and D-glutamate metabolism	471	Metabolism of other amino acids	4
D-Arginine and D-ornithine metabolism	472	Metabolism of other amino acids	1
Glutathione metabolism	480	Metabolism of other amino acids	51
N-Glycan biosynthesis	510	Glycan biosynthesis and metabolism	49
Mucin type O-Glycan biosynthesis	512	Glycan biosynthesis and metabolism	31
Other types of O-glycan biosynthesis	514	Glycan biosynthesis and metabolism	30
Glycosaminoglycan biosynthesis-chondroitin sulfate / dermatan sulfate	532	Glycan biosynthesis and metabolism	20
Glycosaminoglycan biosynthesis-heparansulfate / heparin	534	Glycan biosynthesis and metabolism	24
Glycosaminoglycan biosynthesis-keratansulfate	533	Glycan biosynthesis and metabolism	15
Glycosaminoglycan degradation	531	Glycan biosynthesis and metabolism	19
Glycosylphosphatidylinositol(GPI)-anchorbiosynthesis	563	Glycan biosynthesis and metabolism	25
Glycosphingolipid biosynthesis-lacto and neolacto series	601	Glycan biosynthesis and metabolism	26
Glycosphingolipid biosynthesis-globo series	603	Glycan biosynthesis and metabolism	14
Glycosphingolipid biosynthesis-ganglioseries	604	Glycan biosynthesis and metabolism	15
Other glycan degradation	511	Glycan biosynthesis and metabolism	18
Thiamine metabolism	730	Metabolism of cofactors and vitamins	4
Riboflavin metabolism	740	Metabolism of cofactors and vitamins	13
Vitamin B6 metabolism	750	Metabolism of cofactors and vitamins	6
Nicotinate and nicotinamide metabolism	760	Metabolism of cofactors and vitamins	28
Pantothenate and CoA biosynthesis	770	Metabolism of cofactors and vitamins	17
Biotin metabolism	780	Metabolism of cofactors and vitamins	3
Lipoic acid metabolism	785	Metabolism of cofactors and vitamins	3
Folate biosynthesis	790	Metabolism of cofactors and vitamins	14
One carbon pool by folate	670	Metabolism of cofactors and vitamins	20
Retinol metabolism	830	Metabolism of cofactors and vitamins	68
Porphyrin and chlorophyll metabolism	860	Metabolism of cofactors and vitamins	43
Ubiquinone and other terpenoid-quinone biosynthesis	130	Metabolism of cofactors and vitamins	10
Terpenoid backbone biosynthesis	900	Metabolism of terpenoids and polyketides	21
Caffeine metabolism	232	Biosynthesis of other secondary metabolites	7
Butirosin and neomycin biosynthesis	524	Biosynthesis of other secondary metabolites	5
Metabolism of xenobiotics by cytochromeP450	980	Xenobiotics biodegradation and metabolism	80
Drug metabolism-cytochrome P450	982	Xenobiotics biodegradation and metabolism	74
Drug metabolism-other enzymes	983	Xenobiotics biodegradation and metabolism	51

## Sheet: Table S3
TABLE S3: CAD Genes ID identified in co-expression network.
chID
105
183
1586
1611
2917
2982
4134
4625
4629
5126
5522
9229
9833
23544
23551
55017
55759
56776
60676
60680
84790
127833
133491
259232

## Sheet: Table S4
TABLE S4: Metabolic genes ID identified in co-expression network.
meggID
52
107
108
158
191
230
270
471
534
535
761
1158
1160
1339
1583
1584
1588
1589
1603
1607
1650
1719
1786
2027
2572
2583
2618
2720
2983
3284
3706
4247
4842
5223
5224
5232
5427
5557
5837
5860
6120
6240
6241
7083
7298
7371
7372
7468
8639
8789
8833
8836
9348
9533
10606
10690
10715
10858
11041
11164
23057
23127
23205
23305
26289
27087
27231
56895
57026
57571
64077
79723
79966
81616
84735
92483
93034
114805
135152
222537
266722
